# Supplementary material for: Salvage stereotactic body radiation therapy for locally recurrent prostate cancer following primary radiation therapy, are benefits worth toxicity risk?: A systematic review
Source: Research Square preprint supplement (doi:10.21203/rs.3.rs-1517641/v1), 2022-04-25
Supplement: Supplementary file 1 [file b653fa7edbf780a565b3b45a.docx]

| Study | Median dose of SBRT (gy) [range] | No. of fractions of SBRT (%) | Concurrent ADT at recurrence | Proportion of prostate targeted. | Use of rectal spacer |
| --- | --- | --- | --- | --- | --- |
| Leroy 2017 | 36 Gy | 6 | 61% | Focal (<50%) = 13%  Half gland = 4%  Whole gland = 83% | N/A |
| Mbeutcha 2017 | 35 Gy | 5 | 56% | < half gland = 100% | N/A |
| Jereczek-Fossa 2018 | 30 [20-30] | 5 [2-10] | 25% | Prostate = 70%  Whole gland + lesion = 30% | N/A |
| Paquier | 36 [25-36.25] | 5 (35%) – 6 (65%) | 34% | < half gland = 32%  Half gland = 18%  Whole gland = 49% | 9% (balloon) |
| Fuller 2020 | 34 | 5 | 14% | Whole gland + extensions = 100% | N/A |
|  |  |  |  |  |  |

Table 3; Characteristics of SBRT utilised for included studies.

**Table 3**: Summary of salvage SBRT characteristics including, dosage, fractions and locations of therapy.
